# Supplementary material for: Evaluation of Work-Related Personal Exposure to Aerosol Particles
Source: MDPI journal article supplement (doi:10.3390/toxics10070405), 2022-07-21
Supplement: s1 [file s1]

# Supplementary Material:

**Table S1.** Geometric standard deviation values for particulate matter (PM) deposition in the multiple-path particle dosimetry model (MPPD).

| Routes       | Date and time         | PM <sub>2.5-10</sub> | PM <sub>1-2.5</sub> | PM <sub>1</sub> |
|--------------|-----------------------|----------------------|---------------------|-----------------|
|              |                       | GSD                  |                     |                 |
| FTMC1-FTMC2  | 17/03/2022<br>midday  | 1.5                  | 1.44                | 1.21            |
| FTMC1-HOME   | 17/03/2022<br>evening | 1.48                 | 1.51                | 1.21            |
| FTMC1-HOME*  | 18/03/2022<br>morning | 1.46                 | 1.44                | 1.22            |
| Office FTMC1 | 18/03/2022            | 1.56                 | 1.48                | 1.19            |

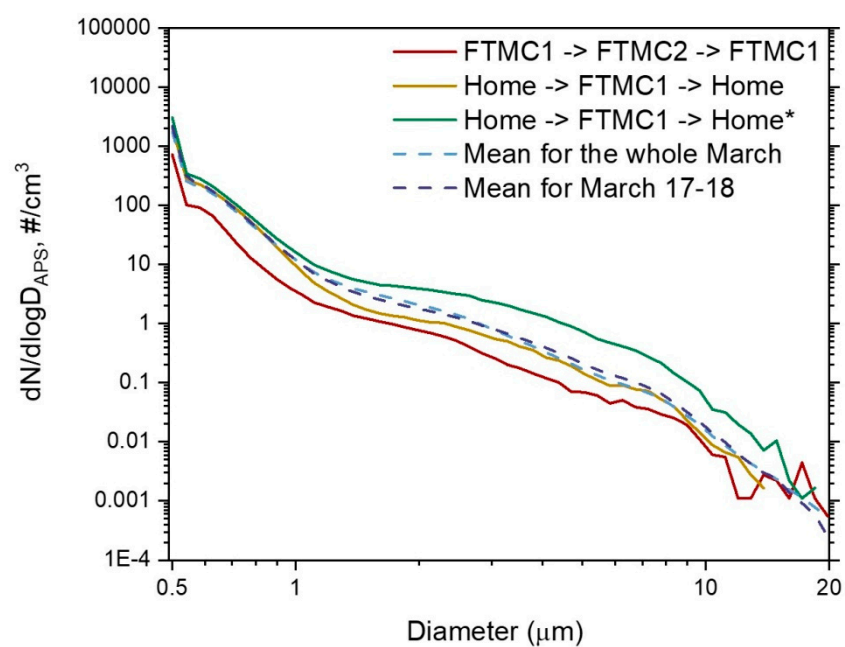

**Figure S1.** Average particle number size distributions during the field experiments and the entire study.

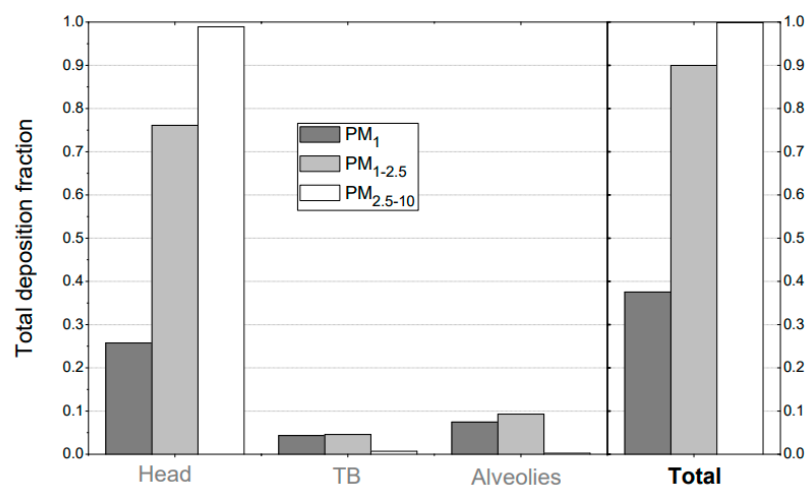

**Figure S2.** The total deposition fraction (DF) for PM fractions  $PM_{<1}$ ,  $PM_{1-2.5}$ ,  $PM_{2.5-10}$
